# Supplementary material for: A complex network approach reveals a pivotal substructure of genes linked to schizophrenia
Source: PubMed Central journal article supplement (PMC5755767; doi:10.1371/journal.pone.0190110), 2018-01-05
Supplement: pone.0190110.s001.pdf [file pone.0190110.s001.pdf]

**S1 Table. List of genes obtained through four different community detection algorithms**. The first column reports the probe name in Braincloud. The second column reports the corresponding gene name.

| <b>OligoID</b> | <b>Gene</b> | <b>Fast Greedy</b> | <b>Louvain</b> | <b>InfoMap</b> | <b>Walktrap</b> |
|----------------|-------------|--------------------|----------------|----------------|-----------------|
| hHC020532      | CPLP        | X                  | X              | X              | X               |
| hHC025044      | SDK2        | X                  | X              | X              | X               |
| hHC025152      | TIGD1       | X                  | X              | X              | X               |
| hHR025236      | OR2S2       | X                  |                | X              | X               |
| hHC028608      | PCBD2       | X                  |                | X              | X               |
| hHR031476      | TAS2R42     | X                  |                | X              | X               |
| hHA033312      | CHIA        | X                  |                | X              | X               |
| hHA034164      | RNF128      | X                  | X              | X              | X               |
| hHA034272      | MAP4        | X                  | X              | X              | X               |
| hHA034368      | ARSB        | X                  | X              | X              | X               |
| hHA034464      | IGSF1       | X                  | X              | X              | X               |
| hHA034560      | TTN         | X                  | X              | X              | X               |
| hHA034656      | EFCAB6      | X                  |                | X              | X               |
| hHA034644      | TTN         | X                  | X              | X              | X               |
| hHA034944      | RBM6        |                    |                | X              |                 |
| hHA035508      | USH2A       | X                  | X              | X              | X               |
| hHA035616      | DRD2        | X                  | X              | X              | X               |
| hHA035604      | PTPN7       | X                  | X              | X              | X               |
| hHA035796      | DHX9        | X                  | X              | X              | X               |
| hHA035904      | DNAH9       | X                  | X              | X              | X               |
| hHA035892      | GPLD1       | X                  | X              | X              |                 |
| hHA035988      | CNR1        | X                  | X              | X              | X               |
| hHA036180      | ING1        | X                  | X              | X              | X               |
| hHA038868      | HS6ST2      | X                  | X              | X              | X               |
| hHA039264      | GATAD2A     | X                  | X              | X              | X               |
| hHA039456      | NEURL4      | X                  |                | X              | X               |
| hHA039552      | TTN         |                    |                | X              |                 |
| hHA040020      | LTBP1       | X                  | X              | X              | X               |
| hHA040404      | JPH2        | X                  | X              | X              | X               |
| hHA040704      | DAZAP1      | X                  | X              | X              | X               |
