# Supplementary material for: A complex network approach reveals a pivotal substructure of genes linked to schizophrenia
Source: PubMed Central journal article supplement (PMC5755767; doi:10.1371/journal.pone.0190110), 2018-01-05
Supplement: pone.0190110.s002.pdf [file pone.0190110.s002.pdf]

**S2 Table. Independent evidence for gene-gene pairs of co-expression and genetic interactions in literature.** The table shows independent evidence for gene-gene pairs of co-expression and genetic interactions in literature. All the genes refer to the *DRD2* detected community.

| Gene 1  | Gene 2  | Type                 | Source                         |
|---------|---------|----------------------|--------------------------------|
| USH2A   | EFCAB6  | Co-expression        | Smirnov-Cheung-2009 [1]        |
| OR2S2   | USH2A   | Co-expression        | Smirnov-Cheung-2009 [1]        |
| PTPN7   | TTN     | Co-expression        | Smirnov-Cheung-2009 [1]        |
| JPH2    | EFCAB6  | Co-expression        | Smirnov-Cheung-2009 [1]        |
| GATAD2A | MAP4    | Co-expression        | Smirnov-Cheung-2009 [1]        |
| DAZAP1  | GATAD2A | Co-expression        | Smirnov-Cheung-2009 [1]        |
| TTN     | MAP4    | Co-expression        | Perou-Botstein-1999 [2]        |
| GATAD2A | DHX9    | Co-expression        | Perou-Botstein-1999 [2]        |
| RNF128  | IGSF1   | Co-expression        | Mallon-McKay-2013 [3]          |
| USH2A   | TAS2R42 | Co-expression        | Mallon-McKay-2013 [3]          |
| OR2S2   | ARSB    | Co-expression        | Dobbin-Giordano-2005 [4]       |
| PTPN7   | ARSB    | Co-expression        | Dobbin-Giordano-2005 [4]       |
| JPH2    | EFCAB6  | Co-expression        | Dobbin-Giordano-2005 [4]       |
| ING1    | SDK2    | Co-expression        | Ramaswamy-Golub-2001 [5]       |
| ING1    | IGSF1   | Co-expression        | Ramaswamy-Golub-2001 [5]       |
| PTPN7   | IGSF1   | Co-expression        | Burington-Shaughnessy-2008 [6] |
| PTPN7   | IGSF1   | Co-expression        | Wu-Garvey-2007 [7]             |
| GATAD2A | NEURL4  | Co-expression        | Innocenti-Brown-2011 [8]       |
| EFCAB6  | PCBD2   | Genetic Interactions | Lin-Smith-2010 [9]             |
| CNR1    | EFCAB6  | Genetic Interactions | Lin-Smith-2010 [9]             |
| CNR1    | DRD2    | Genetic Interactions | Lin-Smith-2010 [9]             |
| IGSF1   | DRD2    | Genetic Interactions | Lin-Smith-2010 [9]             |
| IGSF1   | DNAH9   | Genetic Interactions | Lin-Smith-2010 [9]             |
| RNF128  | MAP4    | Genetic Interactions | Lin-Smith-2010 [9]             |
| ING1    | DRD2    | Genetic Interactions | Lin-Smith-2010 [9]             |
| ING1    | IGSF1   | Genetic Interactions | Lin-Smith-2010 [9]             |
| TTN     | GPLD1   | Genetic Interactions | Lin-Smith-2010 [9]             |
| USH2A   | TTN     | Genetic Interactions | Lin-Smith-2010 [9]             |
| LTBP1   | DRD2    | Genetic              | Lin-Smith-2010 [9]             |

|       |       | Interactions         |                    |
|-------|-------|----------------------|--------------------|
| LTBP1 | DNAH9 | Genetic Interactions | Lin-Smith-2010 [9] |
| LTBP1 | IGSF1 | Genetic Interactions | Lin-Smith-2010 [9] |
| ARSB  | GPLD1 | Genetic Interactions | Lin-Smith-2010 [9] |
| DHX9  | PCBD2 | Genetic Interactions | Lin-Smith-2010 [9] |
| PTPN7 | DRD2  | Genetic Interactions | Lin-Smith-2010 [9] |

## References

1. Smirnov, D. A., Morley M., Shin E., Spielman R. S., Cheung V. G. Genetic analysis of radiation-induced changes in human gene expression. *Nature*. 2009 May 28;459(7246): 587-91.
2. Perou, C. M., Jeffrey, S. S., van de Rijn, M., Rees, C. A., Eisen, M. B., Ross, D. T., Pergamenschikov, A., Williams, C. F., Zhu, S. X., Lee, J. C. , Lashkari, D., Shalon, D., Brown, P. O., Botstein, D. Distinctive gene expression patterns in human mammary epithelial cells and breast cancers. *Proc Natl Acad Sci U S A*. 1999 Aug 3; 96(16):9212-7.
3. Mallon, B.S., Chenoweth, J. G., Johnson, K. R., Hamilton, R. S., Tesar, P. J., Yavatkar, A. S., Tyson, L. J., Park, K., Chen, K. G., Fann, Y. C., McKay, R. D. StemCellDB: the human pluripotent stem cell database at the National Institutes of Health. *Stem Cell Res*. 2013 Jan;10(1): 57-66.
4. Dobbin, K. K., et al. Interlaboratory comparability study of cancer gene expression analysis using oligonucleotide microarrays. *Clin Cancer Res*. 2005; 11: 565-572.
5. Ramaswamy, S., Tamayo, P., Rifkin, R., Mukherjee, S., Yeang, C. H., Angelo, M., Ladd, C., Reich, M., Latulippe, E., Mesirov, J. P., Poggio, T., Gerald, W., Loda, M., Lander, E. S., Golub, T. R. Multiclass cancer diagnosis using tumor gene expression signatures. *Proc Natl Acad Sci U S A*. 2001; 98(26):15149-54.
6. Burington, B., Barlogie, B., Zhan, F., Crowley, J., Shaughnessy, J. D. Tumor cell gene expression changes following short-term in vivo exposure to single agent chemotherapeutics are related to survival in multiple myeloma. *Clin Cancer Res*. 2008; 14: 4821-4829.
7. Wu, X., Wang, J., Cui, X., Maianu, L., Rhees, B., Rosinski, J., So, W. V., Willi, S. M., Osier M. V., Hill, H. S., Page, G. P., Allison, D. B., Martin, M., Garvey, W. T. The effect of insulin on expression of genes and biochemical pathways in human skeletal muscle. *Endocrine*. 2007; Feb;31(1): 5-17.
8. Innocenti, F., Cooper, G. M., Stanaway, I. B., Gamazon, E. R., Smith, J. D., Mirkov, S., Ramirez, J., Liu, W., Lin, Y. S., Moloney, C., Aldred, S. F., Trinklein, N. D. , Schuetz, E., Nickerson, D. A., Thummel, K. E., Rieder, M. J., Rettie, A. E., Ratain, M. J., Cox, N. J., Brown, C. D. Identification, replication, and functional fine-mapping of expression quantitative trait loci in primary human liver tissue. *PLoS Genet*. 2011 May;7(5):e1002078.
9. Lin, A., Wang R. T., Ahn, S., Park, C. C., Smith D. J. A genome-wide map of human genetic interactions inferred from radiation hybrid genotypes. *Genome Res*. 2010 Aug; 20(8): 1122–1132.
